# Supplementary material for: Magnetic Proximity Effect and Valley Manipulation in 2D CrSBr/TMD Heterostructures
Source: Research Square preprint supplement (doi:10.21203/rs.3.rs-8836056/v1), 2026-02-11
Supplement: Supplementary file 1 [file e03c94916b1d362576c71a06.docx]

Supplementary Materials for

**Magnetic Proximity Effect and Valley Manipulation in 2D CrSBr/TMD Heterostructures**

Kaixuan Zhang *et al.*

*Corresponding author. Email: zhaowj@seu.edu.cn; phtan@semi.ac.cn; jlwang@seu.edu.cn

**This PDF file includes:**

Supplementary Text

Section S1. Theoretical Calculations of the Electronic Band Structures

Section S2. Magnetic Proximity Effect Induced Spin-selective Interlayer Charge Transfer

Fig. S1. Morphology characterization of the CrSBr/WSe2 heterostructure.

Fig. S2. Optical properties of the CrSBr/WSe2 heterostructure on quartz substrates.

Fig. S3. Optical properties of the CrSBr/MoSe2 heterostructure.

Fig. S4. TAS dynamics of 1L WSe2.

Fig. S5. Temperature- and polarization-dependent TAS of the CrSBr/WSe2 heterostructure.

Fig. S6. TAS of 1-3L CrSBr

Fig. S7. The 1L-CrSBr/1L-WSe2 supercell.

Supplementary Text

**Section S1: Theoretical Calculations of the Electronic Band Structures**

All the calculations were carried out using DFT as implemented in the Vienna ab initio simulation package (VASP).1 The projector augmented wave (PAW) method was employed,2 and the generalized gradient approximation (GGA) exchange-correlation functional developed by Perdew, Burke, and Ernzerhof (PBE) was applied.3 The CrSBr/WSe2 heterostructure was constructed by using Hetbuilder.4 An energy cutoff of 400 eV was set, and all the structures were fully optimized until satisfying a force criterion of 0.02 eV/Å. K-point meshes of 1 × 1 × 1 and 3 × 3 × 1 were used for geometry optimization and electronic structure calculations, respectively. The structure was inserted a large distance of vacuum space greater than 15 Å to eliminate the interaction between two periodic units. The semiempirical correction scheme of Grimme, DFT-D3 (BJ),5 was applied to treat the vdW weak interaction. In order to better describe the correlation effects for Cr-d orbitals, the PBE + U approach introduced by Liechtenstein was used, with the values of U and J are 3 eV and 1.5 eV, respectively.6 The supercell was generated using a lattice-matching algorithm via the Schwalbe-Koda method, 7 which systematically searches integer matrix pairs that minimize lattice mismatch under rotation. The supercell is generated by and for CrSBr and WSe2(Fig. S7), respectively, resulting in a supercell containing 159 atoms with 1% deformation. The unfolded band structures were obtained by using VASPKIT toolkit.8

**Section S2. Magnetic Proximity Effect Induced Spin-selective Interlayer Transfer**

**The magnetic order in monolayer and fewlayer CrSBr**

The magnetism of CrSBr originates from localized Cr3+ moments (3d3, S=3/2). Its magnetic properties are well described by a Heisenberg-type Hamiltonian,

Previous studies show the ferromagnetic exchange within each layer and antiferromagnetic coupling between adjacent layers, resulting in an A-type antiferromagnetic ground state with strong in-plane easy-axis anisotropy.9-11 In the monolayer limit, CrSBr therefore exhibits a net in-plane magnetization.

**Electronic band structure of monolayer WSe2**

At the band extreme of K and K' valleys of monolayer WSe2, the electronic states are described by an effective k· p Hamiltonian. When retaining only the spin- and valley-dependent terms,

where labels the K/K' valleys, respectively, and λ denotes the spin–orbit coupling. The SOC term has opposite signs in opposite valleys, giving rise to the spin–valley locking and valley-selective optical selection rules.12

**Magnetic-proximity-induced exchange interaction**

In a CrSBr/WSe2 heterostructure, interfacial exchange coupling between electrons of WSe2 and localized Cr spins of CrSBr can be written as

Within a mean-field approximation, this interaction can be reduced to an effective exchange field acting on the WSe2 electrons,

where **n** is the magnetization direction of CrSBr and △ex is the proximity-induced exchange splitting. This equation is commonly used for magnetic proximity effects in 2D magnets/TMDs heterostructures.13-15 For monolayer CrSBr, **n** lies predominantly in its *xy* crystal plane.

**Effective spin model and spin-selective interlayer coupling**

Combining the intrinsic spin–orbit coupling in 1L WSe2 with the proximity-induced exchange field, the effective spin Hamiltonian at valley τ is

where the exchange field is assumed to be in-plane. Diagonalization yields eigenenergies and spin polarization:

While the energy spectrum depends only on τ, the spin polarization remains valley dependent. Increasing △ex rotates the electron spin from out-of-plane toward the in-plane direction, which results in a gradual suppressing of the valley-selective optical responses.

In a CrSBr/WSe2 heterostructure with the type-II band alignment, interlayer charge or exciton transfer can be described within the framework of Fermi’s golden rule. The spin-selective interlayer transfer rate () is given by

where is the interlayer tunneling matrix element, are the densities of states of the two layers, and denote the spin eigenstates. The overlap term explicitly depends on the relative spin orientation; for a canting angle between the spin quantization axes, it scales as .14-16

Consequently, magnetic-proximity-induced spin canting in 1L WSe2 leads to the spin-selective interlayer charge transfer and polarization-dependent photoluminescence in CrSBr/WSe2 heterostructures, even in the absence of an out-of-plane magnetic field.


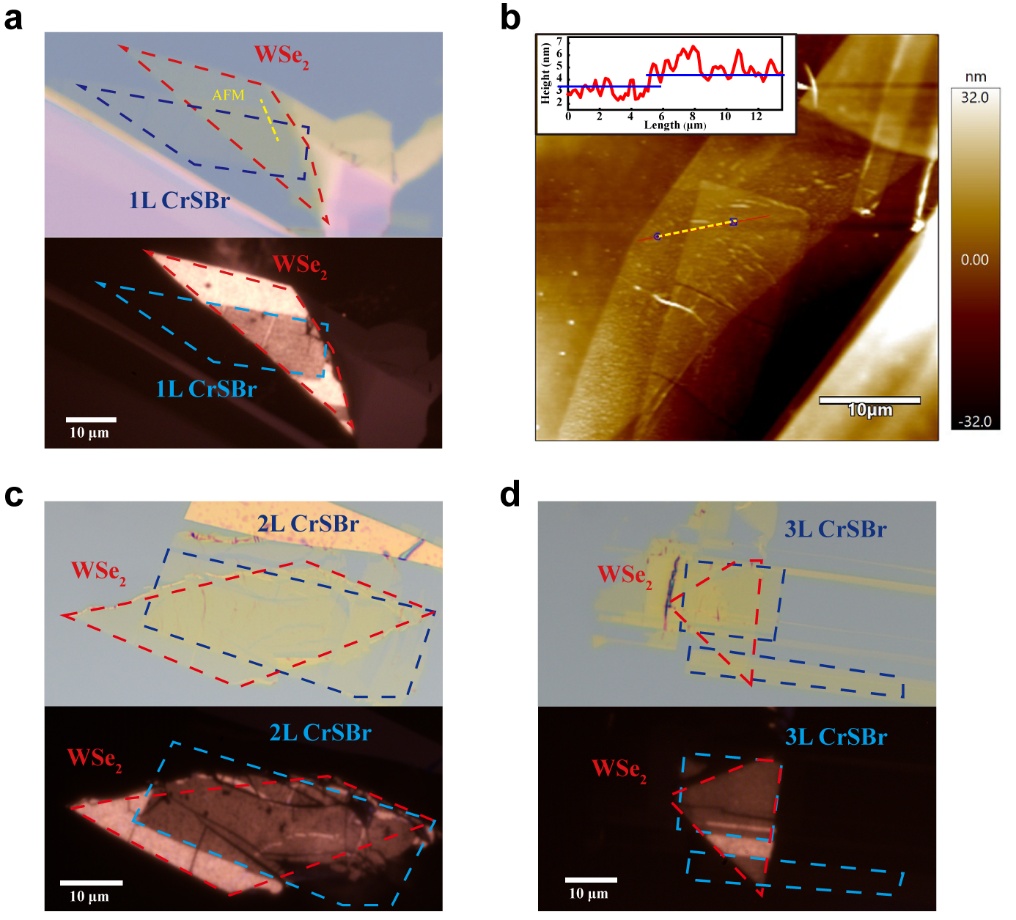


Fig. S1. Morphology characterization of the CrSBr/WSe2 heterostructure.

**a** Optical (upper) and fluorescence (lower) images of the 1L-CrSBr/1L-WSe2 heterostructure shown in Fig. 1a. The uniform fluorescence at different region shows a high quality of this sample. **b** Atomic force microscopy (AFM) image of the same heterostructure. The height measured along the yellow-dashed line is ~1nm which indicates a close contact between CrSBr and WSe2 in the heterostructure region. **c** and **d** Optical images (upper) and fluorescence (lower) images of the 2L-CrSBr/1L-WSe2 and 3L-CrSBr/1L-WSe2 heterostructure, respectively.


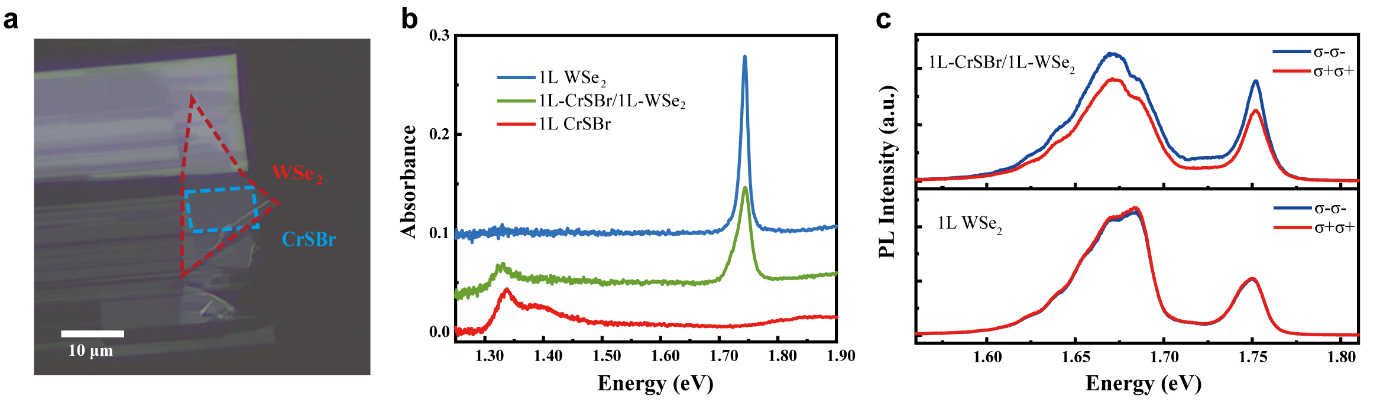


Fig. S2. Optical properties of the CrSBr/WSe2 heterostructure on quartz substrates.

**a** Optical image of the 1L-CrSBr/1L-WSe2 heterostructure fabricated on a quartz substrate. **b** Absorption spectra for this sample at different regions at 4 K. **c** Circularly-polarized PL spectra of 1L WSe2 at different regions at 4 K.


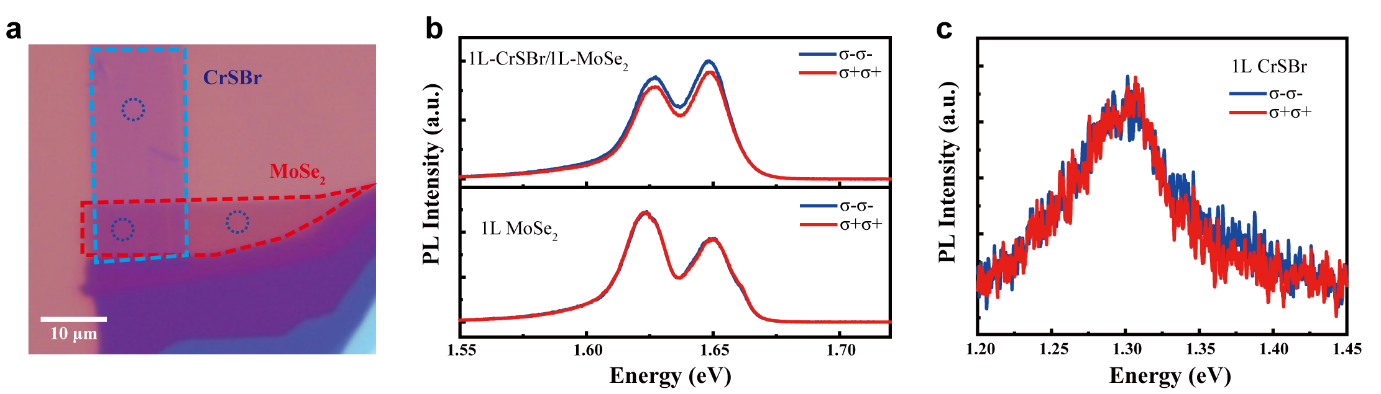


Fig. S3. Optical properties of the CrSBr/MoSe2 heterostructure.

**a** Optical image of a typical 1L-CrSBr/1L-MoSe2 heterostructure fabricated on the Si/SiO2 substrate. **b** Circularly-polarized PL spectra of 1L MoSe2 at different regions at 4 K. **c** Circularly-polarized PL spectra of individual 1L CrSBr at 4 K.


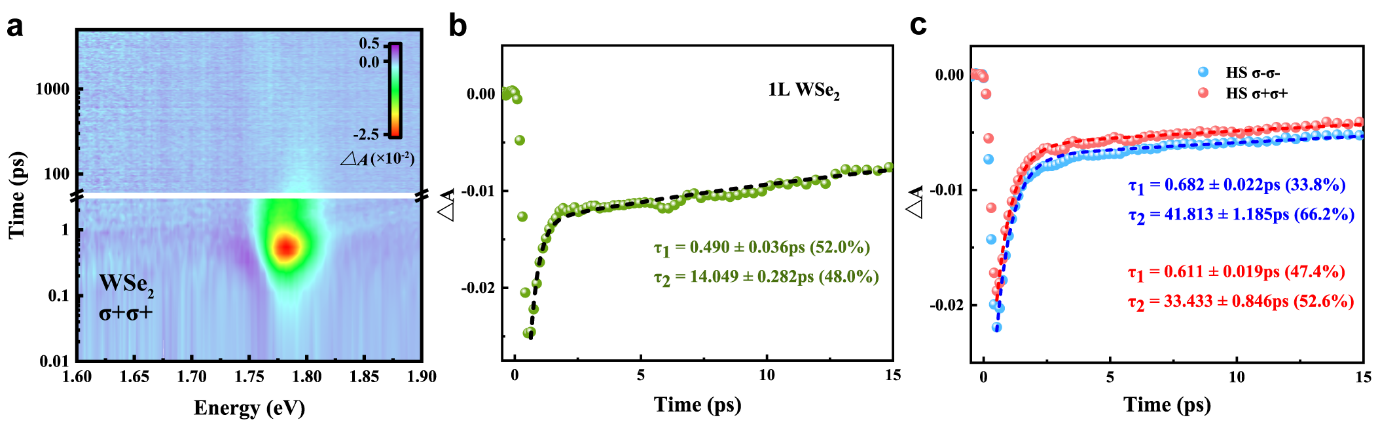


Fig. S4. TAS dynamics of 1L WSe2.

**a** TAS of 1L WSe2 on a quartz substrate measured under the σ+σ+ polarization configuration. **b** The decay dynamics of excitons at a probe energy of 1.78 eV for individual 1L WSe2. **c** The decay dynamics of excitons at a probe energy of 1.78 eV for 1L WSe2 at the heterostructure region. All the decay curves are fitted with a biexponential function, representing the fast and slow decay processes as discussed in the main text.


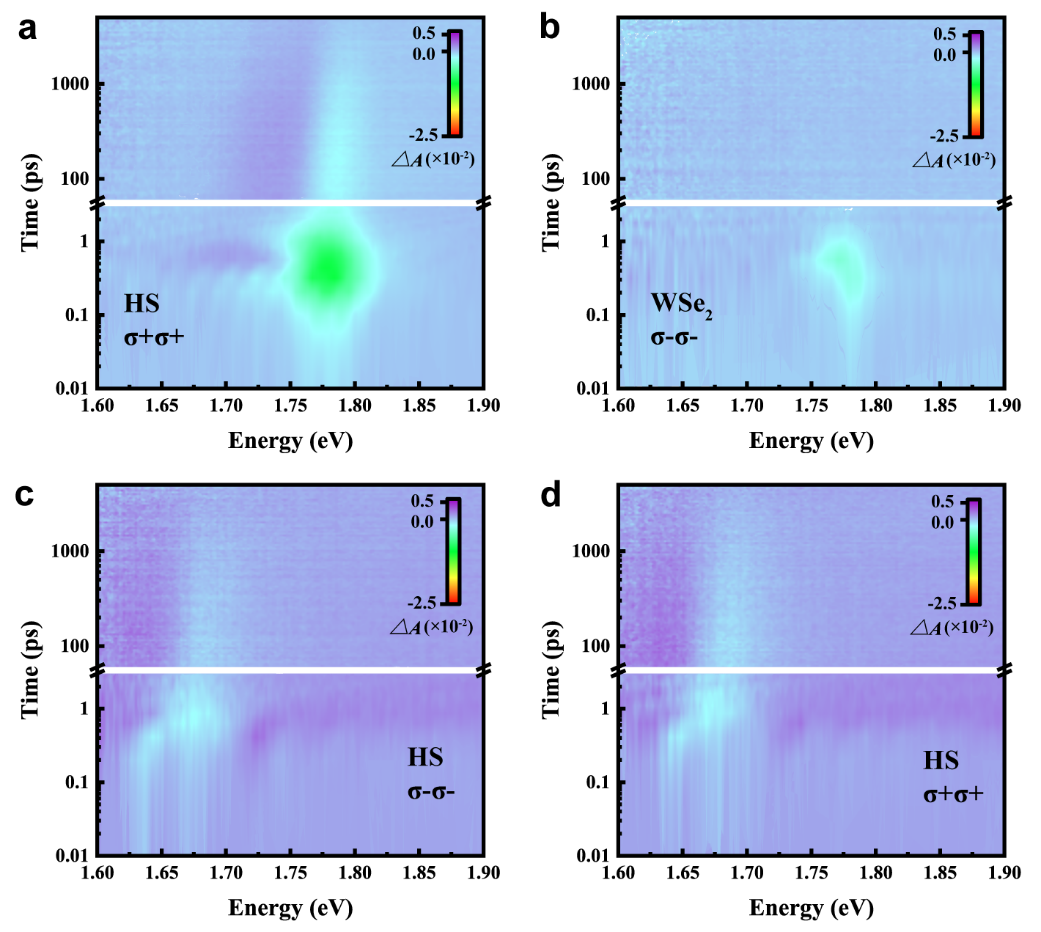


Fig. S5. Temperature- and polarization-dependent TAS of the CrSBr/WSe2 heterostructure.

TAS of the 1L-CrSBr/1L-WSe2 heterostructure **a** and 1L WSe2 **b** measured at 4 K under the σ+σ+ configuration. TAS measured at room temperature under the σ-σ- **c** and σ+σ+ **d** polarization configurations. The pump photon energy was ~1.36 eV with a pump fluence of 113.2 μJ cm-2.


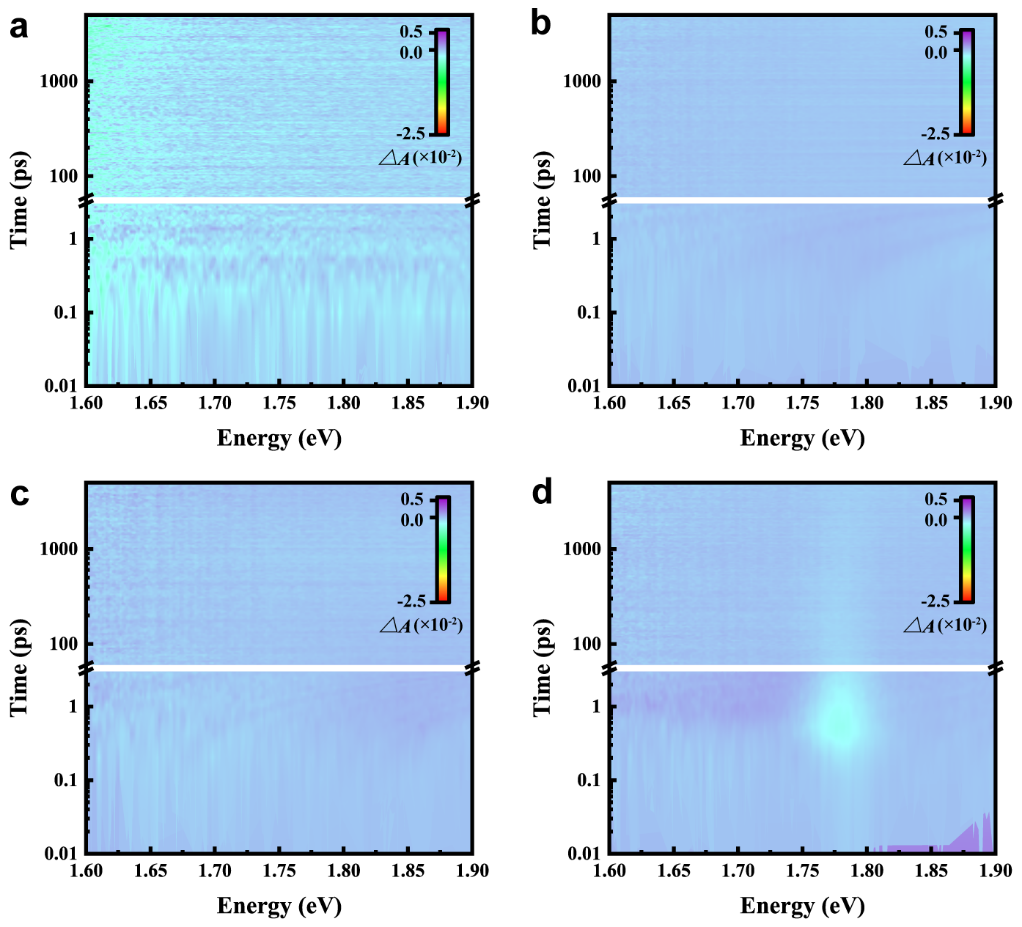


Fig. S6. TAS of 1-3L CrSBr.

TAS of 1L CrSBr measured under the pump photon energy of ~1.36 eV **a** and ~1.96 eV **b**, respectively. TAS of 2L CrSBr **c** and 3L CrSBr **d** measured under a pump photon energy of ~1.96 eV. The pump fluence was kept at ~33.96 μJ cm⁻².


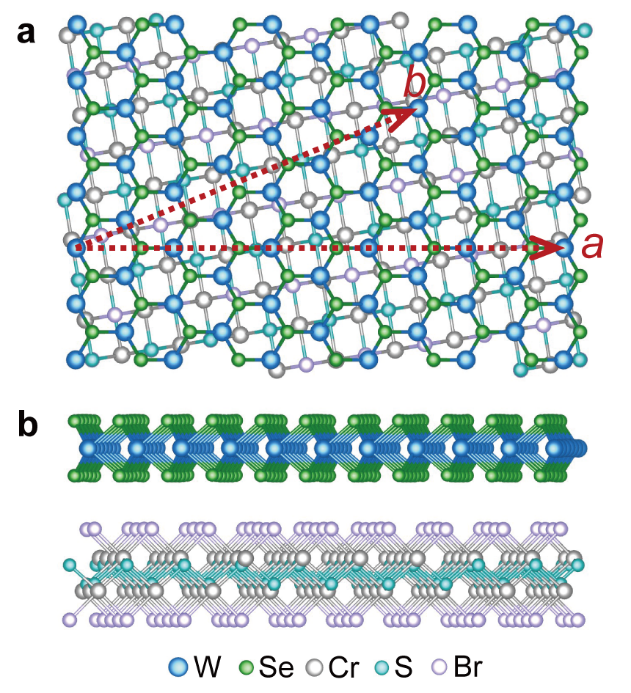


Fig. S7. The 1L-CrSBr/1L-WSe2 supercell.

Top **a** and side **b** views of 1L-CrSBr/1L-WSe2 heterostructure. The dotted arrows indicate the lattice vectors ***a*** and ***b*** for the unit cell of the heterostructure.

**References**

1 Kresse, G. & Furthmüller, J. Efficient iterative schemes for ab initio total-energy calculations using a plane-wave basis set. *Physical Review B* **54**, 11169-11186, doi:10.1103/PhysRevB.54.11169 (1996).

2 Blöchl, P. E. Projector augmented-wave method. *Physical Review B* **50**, 17953-17979, doi:10.1103/PhysRevB.50.17953 (1994).

3 Perdew, J. P., Burke, K. & Ernzerhof, M. Generalized Gradient Approximation Made Simple [Phys. Rev. Lett. 77, 3865 (1996)]. *Physical Review Letters* **78**, 1396-1396, doi:10.1103/PhysRevLett.78.1396 (1997).

4 Bobzien, L. *et al.* Layer-Dependent Charge-State Lifetime of Single Se Vacancies in WSe2. *Physical Review Letters* **134**, 076201, doi:10.1103/PhysRevLett.134.076201 (2025).

5 Grimme, S., Ehrlich, S. & Goerigk, L. Effect of the damping function in dispersion corrected density functional theory. *Journal of Computational Chemistry* **32**, 1456-1465, doi:https://doi.org/10.1002/jcc.21759 (2011).

6 Liechtenstein, A. I., Anisimov, V. I. & Zaanen, J. Density-functional theory and strong interactions: Orbital ordering in Mott-Hubbard insulators. *Physical Review B* **52**, R5467-R5470, doi:10.1103/PhysRevB.52.R5467 (1995).

7 R. Kempt, Hetbuilder-builds heterostructure interfaces. GitHub repository, doi:10.5281/zenodo.4721346 (2021).

8 Wang, V., Xu, N., Liu, J.-C., Tang, G. & Geng, W.-T. VASPKIT: A user-friendly interface facilitating high-throughput computing and analysis using VASP code. *Computer Physics Communications* **267**, 108033, doi:https://doi.org/10.1016/j.cpc.2021.108033 (2021).

9 Scheie, A. *et al.* Spin Waves and Magnetic Exchange Hamiltonian in CrSBr. *Advanced Science* **9**, 2202467, doi:https://doi.org/10.1002/advs.202202467 (2022).

10 Ziebel, M. E. *et al.* CrSBr: An Air-Stable, Two-Dimensional Magnetic Semiconductor. *Nano Letters* **24**, 4319-4329, doi:10.1021/acs.nanolett.4c00624 (2024).

11 Lee, J.-U. *et al.* Ising-Type Magnetic Ordering in Atomically Thin FePS3. *Nano Letters* **16**, 7433-7438, doi:10.1021/acs.nanolett.6b03052 (2016).

12 Xiao, D., Liu, G.-B., Feng, W., Xu, X. & Yao, W. Coupled Spin and Valley Physics in Monolayers of MoS2 and Other Group-VI Dichalcogenides. *Physical Review Letters* **108**, 196802, doi:10.1103/PhysRevLett.108.196802 (2012).

13 Zollner, K., Faria Junior, P. E. & Fabian, J. Proximity exchange effects in MoSe2 and WSe2 heterostructures with CrI3: Twist angle, layer, and gate dependence. *Physical Review B* **100**, 085128, doi:10.1103/PhysRevB.100.085128 (2019).

14 Scharf, B., Xu, G., Matos-Abiague, A. & Žutić, I. Magnetic Proximity Effects in Transition-Metal Dichalcogenides: Converting Excitons. *Physical Review Letters* **119**, 127403, doi:10.1103/PhysRevLett.119.127403 (2017).

15 Zhong, D. *et al.* Layer-resolved magnetic proximity effect in van der Waals heterostructures. *Nature Nanotechnology* **15**, 187-191, doi:10.1038/s41565-019-0629-1 (2020).

16 Zhang, X.-X. *et al.* Magnetic brightening and control of dark excitons in monolayer WSe2. *Nature Nanotechnology* **12**, 883-888, doi:10.1038/nnano.2017.105 (2017).
